# Supplementary material for: REV-ERBα integrates colon clock with experimental colitis through regulation of NF-κB/NLRP3 axis
Source: PubMed Central journal article supplement (PMC6185905; doi:10.1038/s41467-018-06568-5), 2018-10-12
Supplement: 41467_2018_6568_MOESM1_ESM.pdf [file 41467_2018_6568_MOESM1_ESM.pdf]

Supplementary Information

**REV-ERB $\alpha$  Integrates Colon Clock with Experimental Colitis through  
Regulation of NF- $\kappa$ B/NLRP3 Axis**

Wang et al.

**Supplementary Table 1.** Mouse primer sequences for quantitative real-time PCR (qPCR)

| <b>Gene</b>                       | <b>Forward ( 5'-3' sequence)</b> | <b>Reverse ( 3'-5' sequence)</b> |
|-----------------------------------|----------------------------------|----------------------------------|
| <i>Bmal1</i>                      | CTCCAGGAGGCAAGAAGATTC            | ATAGTCCAGTGAAGGAATG              |
| <i>Bmal1</i> ( knockout region )  | AGCGACTTCATGTCTCCG               | GCTCTTACTAGTCAGTGGCA             |
| <i>Dbp</i>                        | ACATCTAGGGACACCCAGTC             | AAGTCTCATGGCCTGGAATG             |
| <i>Rev-erba</i>                   | TTTTTCGCCGGAGCATCCAA             | ATCTCGGCAAGCATCCGTTG             |
| <i>Rev-erba</i> (knockout region) | TCAGCTACAACCTCCACACCG            | CCCTGGCGTAGACCATTGAG             |
| <i>Rev-erbβ</i>                   | GGAGTTCATGCTTGTGAAGGCTGT         | CAGACACTTCTTAAAGCGGCACTG         |
| <i>Clock</i>                      | TCTGGATTGCTGGCTAATGG             | GACCTCCGCTGTGTCATCTT             |
| <i>Per2</i>                       | CCACACTTGCCTCCGAAATA             | ACTGCCTCTGGACTGGAAGA             |
| <i>Cry1</i>                       | CCCAGGCTTTTCAAGGAATGGAAC         | GCAGGGAGTTTGCATTATTGAG           |
| <i>Npas2</i>                      | CAGGACTGGAAGCCATCATT             | CTGATGTTGGAGGCATTAGATGGC         |
| <i>Rora</i>                       | GAGACCCCGCTGACCCA                | TGACTGAGATACCTCGGCTG             |
| <i>IL-1α</i>                      | CCGGGTGACAGTATCAGCAA             | CTGGGTTGGATGGTCTCTTCC            |
| <i>IL-1β</i>                      | AATGCCACCTTTTGACAGTGATG          | AGCTTCTCCACAGCCACAAT             |
| <i>IL-18</i>                      | TCAAAGTGCCAGTGAACCCC             | GGTCACAGCCAGTCTCTTAC             |
| <i>IL-6</i>                       | ATCCAGTTGCCTTCTTGGGACTGA         | TAAGCCTCCGACTTGTGAAGTGGT         |
| <i>Tnfa</i>                       | AGGGTCTGGGCCATAGAACT             | CCACCACGCTCTTCTGTCTAC            |
| <i>IFN-γ</i>                      | GCTACACACTGCATCTTGGC             | CATGTCACCATCCTTTTGCCAG           |
| <i>Nlrp3</i>                      | ATTACCCGCCGAGAAAGG               | TCGCAGCAAAGATCCACACAG            |
| <i>ASC</i>                        | CTGGAGTCGTATGGCTTGGAG            | CAAAGTGCCTGTTCTGGCTGTA           |
| <i>Casp1</i>                      | ACAAGGCACGGGACCTATG              | TCCCAGTCAGTCTGGAATG              |
| <i>p65</i>                        | ACTGCCGGGATGGCTACTAT             | TCTGGATTGCTGGCTAATGG             |
| <i>p50</i>                        | GGGGCCTGCAAAGTTATC               | TGCTGTTACGGTGCATACCC             |
| <i>18s</i>                        | CGGACAGGATTGACAGATTGATAGC        | TGCCAGAGTCTCGTTCGTTATCG          |

**Supplementary Table 2. Oligonucleotide sequences for EMSA assays**

| <b>Oligonucleotide</b> | <b>Forward ( 5'-3' sequence)</b> | <b>Reverse ( 3'-5' sequence)</b> |
|------------------------|----------------------------------|----------------------------------|
| Bmal1-RevRE            | GATTGGTCGGAAAGTAGGTTAGTGGTGCGAC  | GTCGCACCACTAACCTACTTTCCGACCAATC  |
| Nlrp3- RevRE           | GTGTCACAGTGACCCCTATATATTTATCT    | AGATAAATATATAGGGGTCCTGTGACAC     |
| Nlrp3- RevRE -mu       | GTGTCACAGGCTAGGCCCCCTTTATCT      | AGATAAAGGGGGGGCTAGCCTGTGACAC     |
| P65- RevRE             | TTCACGGTGTGACCCCTAGCTGGTTCCGG    | CCGGAACCAGCTAGGGTCACACCGTGAA     |
| P65- RevRE -mu         | TTCACGGTGTCAAATACATGGTTCCGG      | CCGGAACCATGTATTTTGACACCGTGAA     |

**Supplementary Table 3. Primer sequences for ChIP assays**

| <b>Gene</b>            | <b>Forward ( 5'-3' sequence)</b> | <b>Reverse ( 3'-5' sequence)</b> |
|------------------------|----------------------------------|----------------------------------|
| Bmal1_ RevRE           | GGAAAGTAGGTTAGTGGTGCGAC          | AAGTCCGGCGCGGGTAAACAGG           |
| Nlrp3_ RevRE           | GCCAATCCGTCTTTGACAGTG            | GCTCCAGTCCGTGTTCTCC              |
| Nlrp3_ Negative region | AATGCTTTTTGCGTTTTGCAGT           | GACTCAGGAAGACAGGAGCC             |
| P65_ RevRE             | TTTCCTCATTGGAGCCTGGA             | CACACATAGGTGCTGTCTGCT            |
| P65_ Negative region   | AATCTGGATGGGAAGAGCCT             | GAAGGGGATGCAGGGGAC               |

**Supplementary Table 4.** Panther Pathway analysis for DEGs. The categories were listed based on the *p* values ( $p < 0.05$ ).

| Term                                                              | Pathway ID | Count | Background number | <i>p</i> value |
|-------------------------------------------------------------------|------------|-------|-------------------|----------------|
| Angiogenesis                                                      | P00005     | 81    | 145               | 1.76E-05       |
| Gonadotropin-releasing hormone receptor pathway                   | P06664     | 106   | 212               | 3.79E-05       |
| Wnt signaling pathway                                             | P00057     | 116   | 246               | 1.12E-04       |
| Interleukin signaling pathway                                     | P00036     | 50    | 83                | 1.77E-04       |
| Inflammation mediated by chemokine and cytokine signaling pathway | P00031     | 102   | 214               | 2.08E-04       |
| PDGF signaling pathway                                            | P00047     | 61    | 113               | 3.55E-04       |
| Integrin signalling pathway                                       | P00034     | 74    | 147               | 4.44E-04       |
| Cadherin signaling pathway                                        | P00012     | 60    | 117               | 1.04E-03       |
| Alzheimer disease-presenilin pathway                              | P00004     | 57    | 111               | 1.33E-03       |
| Endothelin signaling pathway                                      | P00019     | 42    | 74                | 1.34E-03       |
| Huntington disease                                                | P00029     | 52    | 111               | 8.48E-03       |
| Muscarinic acetylcholine receptor 1 and 3 signaling pathway       | P00042     | 29    | 53                | 9.94E-03       |
| Oxytocin receptor mediated signaling pathway                      | P04391     | 29    | 55                | 1.42E-02       |
| EGF receptor signaling pathway                                    | P00018     | 47    | 102               | 1.47E-02       |
| PI3 kinase pathway                                                | P00048     | 24    | 43                | 1.52E-02       |
| VEGF signaling pathway                                            | P00056     | 31    | 61                | 1.66E-02       |

| Term                                                        | Pathway ID | Count | Background number | <i>p</i> value |
|-------------------------------------------------------------|------------|-------|-------------------|----------------|
| Notch signaling pathway                                     | P00045     | 20    | 34                | 1.73E-02       |
| FGF signaling pathway                                       | P00021     | 45    | 99                | 1.97E-02       |
| Histamine H1 receptor mediated signaling pathway            | P04385     | 23    | 42                | 2.01E-02       |
| p53 pathway                                                 | P00059     | 34    | 70                | 2.01E-02       |
| 5-Hydroxytryptamine degradation                             | P04372     | 14    | 21                | 2.16E-02       |
| 5HT2 type receptor mediated signaling pathway               | P04374     | 31    | 63                | 2.27E-02       |
| Insulin/IGF pathway-protein kinase B signaling cascade      | P00033     | 19    | 33                | 2.33E-02       |
| Alpha adrenergic receptor signaling pathway                 | P00002     | 12    | 17                | 2.45E-02       |
| Blood coagulation                                           | P00011     | 20    | 36                | 2.61E-02       |
| Hedgehog signaling pathway                                  | P00025     | 10    | 13                | 2.70E-02       |
| Alzheimer disease-amyloid secretase pathway                 | P00003     | 29    | 59                | 2.71E-02       |
| Circadian clock system                                      | P00015     | 8     | 9                 | 2.81E-02       |
| Metabotropic glutamate receptor group II pathway            | P00040     | 21    | 39                | 2.88E-02       |
| Synaptic vesicle trafficking                                | P05734     | 15    | 25                | 3.26E-02       |
| Apoptosis signaling pathway                                 | P00006     | 45    | 104               | 3.49E-02       |
| Plasminogen activating cascade                              | P00050     | 9     | 12                | 3.88E-02       |
| Cytoskeletal regulation by Rho GTPase                       | P00016     | 30    | 65                | 4.35E-02       |
| Muscarinic acetylcholine receptor 2 and 4 signaling pathway | P00043     | 24    | 50                | 4.96E-02       |
| Thyrotropin-releasing hormone receptor signaling pathway    | P04394     | 27    | 58                | 4.99E-02       |

**Supplementary Table 5.** Cosinor analyses of rhythmic expressions of clock genes in the colons of DSS-treated and normal mice. \*p<0.05; n.s., not significant.

| Group   | Gene            | Period(h) | Acrophase (°) | Robustness (%) | Mesor  | Amplitude |      |
|---------|-----------------|-----------|---------------|----------------|--------|-----------|------|
| Normal  | <i>Rev-erba</i> | 22.1      | -196          | 89.3           | 0.7088 | 0.4833    | *    |
|         | <i>Npas2</i>    | 24.8      | -7            | 99.7           | 1.4988 | 0.9062    | *    |
|         | <i>Cry1</i>     | 20.9      | -9            | 92.0           | 2.2653 | 1.4229    | *    |
|         | <i>Per2</i>     | 21,6      | -334          | 89.9           | 4.1565 | 3.2354    | *    |
|         | <i>Clock</i>    | 20.0      | -17           | 76.3           | 1.8286 | 1.0584    | *    |
|         | <i>Dbp</i>      | 22.8      | -258          | 96.3           | 1.8592 | 1.7387    | *    |
|         | <i>Rev-erbβ</i> | 22.7      | -259          | 97.5           | 1.6082 | 1.1407    | *    |
|         | <i>Bmal1</i>    | 23.4      | -28           | 96.6           | 1.3805 | 0.9900    | *    |
|         | <i>Rora</i>     | 20.0      | -347          | 89.5           | 2.2811 | 1.0385    | *    |
| Colitis | <i>Rev-erba</i> | 20.0      | -209          | 83.9           | 1.3313 | 0.3614    | n.s. |
|         | <i>Npas2</i>    | 26.0      | -23           | 71.5           | 0.7656 | 0.2853    | n.s. |
|         | <i>Cry1</i>     | 20.0      | -4            | 83.3           | 1.2854 | 0.3860    | n.s. |
|         | <i>Per2</i>     | 22.4      | -246          | 44.7           | 2.5486 | 1.2691    | n.s. |
|         | <i>Clock</i>    | 26.0      | -7            | 15.1           | 1.4646 | 0.2051    | n.s. |
|         | <i>Dbp</i>      | 20.6      | -240          | 60.0           | 1.2865 | 1.1543    | n.s. |
|         | <i>Rev-erbβ</i> | 20.0      | -209          | 83.9           | 1,3313 | 0.3614    | n.s. |
|         | <i>Bmal1</i>    | 25.3      | -109          | 74.4           | 1.5788 | 0.6104    | n.s. |
|         | <i>Rora</i>     | 20.0      | -331          | 80.4           | 3.5973 | 1.4322    | n.s. |

**Supplementary Table 6.** Scoring criteria for the degree of colonic inflammation. NA, not applicable.

| Criteria                        | Scores |       |          |        |         |
|---------------------------------|--------|-------|----------|--------|---------|
|                                 | 0      | 1     | 2        | 3      | 4       |
| Goblet cell loss                | None   | Mild  | Moderate | Severe | NA      |
| Mucosal thickening              | None   | Mild  | Moderate | Severe | NA      |
| Inflammatory cells infiltration | None   | Mild  | Moderate | Severe | NA      |
| submucosa cell infiltration     | None   | Mild  | Moderate | Severe | NA      |
| Ulcers                          | 0      | 0-25% | 25-50%   | 50-75% | 75-100% |
| Crypt abscesses                 | 0      | 1-3   | 4-6      | 7-9    | ≥10     |

**Supplementary Figure 1.** Heatmap of relative mRNA expressions of inflammatory cytokines in mouse colon.

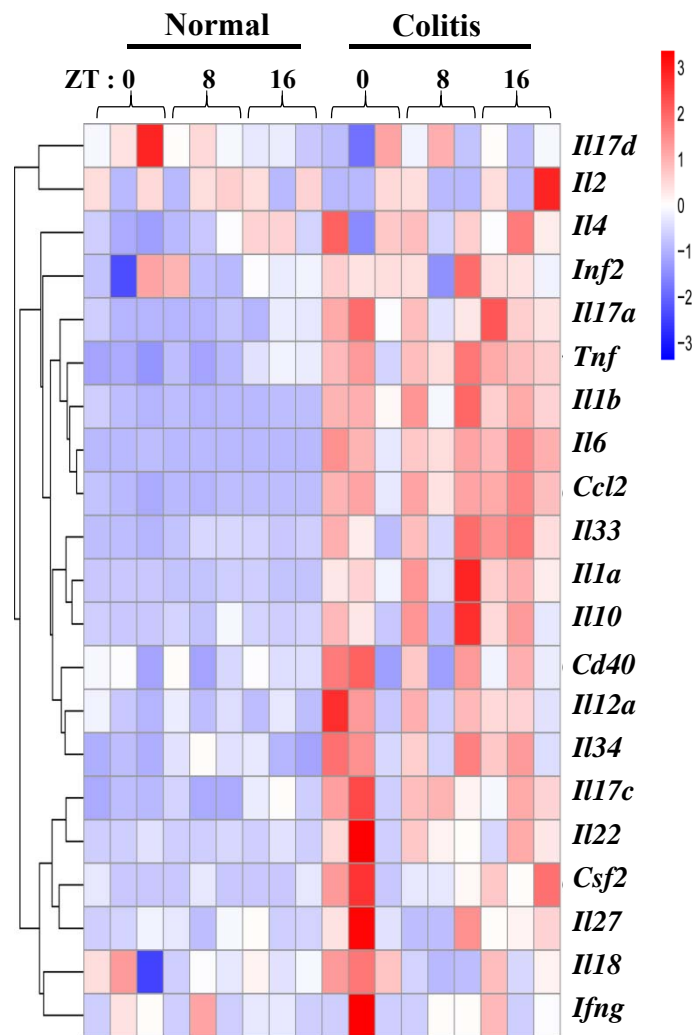



**Supplementary Figure 2. Physiologic disruption of circadian clock exacerbates experimental colitis.**

(A) Representative actograms for the wheel running activities of mice subjected to regular LD12:12 (top panel) and jet lag (bottom panel) in three consecutive days. (B) Weight loss measurements of control and jet-lagged mice treated with DSS. Data are mean  $\pm$  SD ( $n = 8$ ). \* $p < 0.05$  versus control at individual time points. (C) DAI scores of control and jet-lagged mice treated with DSS. Data are mean  $\pm$  SD ( $n = 8$ ). (D) Colon lengths of control and jet-lagged mice treated with DSS. Colon length was assessed at the time of necropsy. Data are mean  $\pm$  SD ( $n = 8$ ). (E) Representative micrographs for H&E staining of the colon. Scale bar = 100  $\mu\text{m}$ . (F) Histopathological scores of control and jet-lagged mice treated with DSS. Data are mean  $\pm$  SD ( $n = 8$ ). (G) MPO activities of control and chronic jet-lagged mice treated with DSS on day 8. Data are mean  $\pm$  SD ( $n = 8$ ). For biochemical analyses, mice were sacrificed at ZT2 and the colons were collected. \* $P < 0.05$  (t test or Mann–Whitney U test). JL, jet lag.

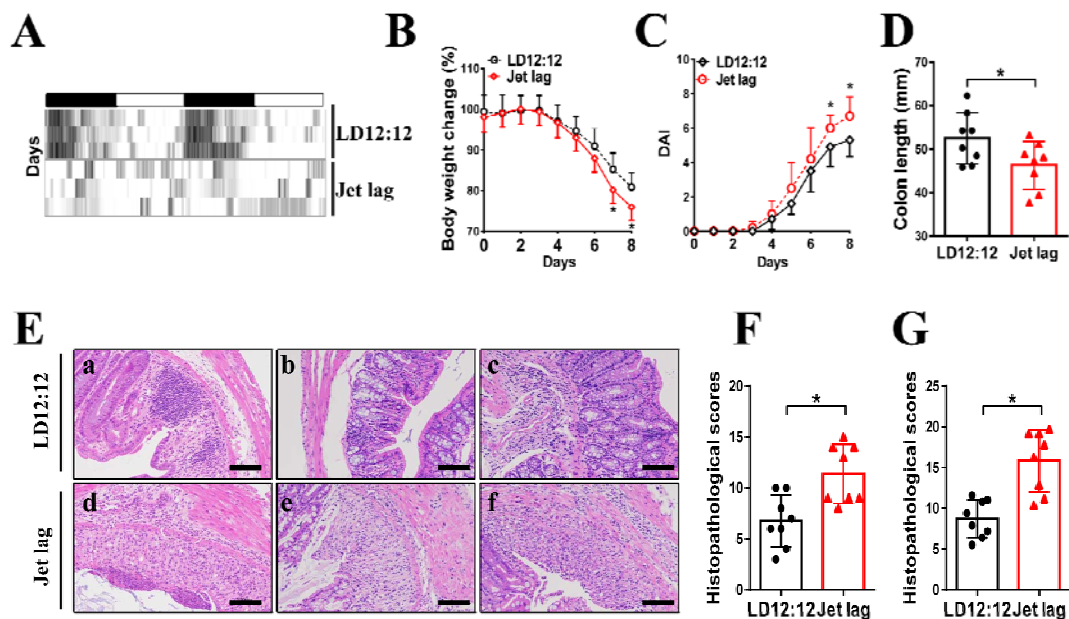

**Supplementary Figure 3. Genetic disruption of circadian clock exacerbates experimental colitis.**

(A) Representative actograms for the wheel running activities of *Bmal1* knockout mice subjected to regular LD12:12 (LD) or constant dark (DD). (B) PCR genotyping of the tails from wild-type mice (WT, +/+), heterozygotes (+/-), and homozygotes. The bands of 677-bp and 577-bp indicate WT and mutant alleles, respectively. (C) qPCR analyses of *Bmal1* mRNAs in the colons from WT and *Bmal1*<sup>-/-</sup> mice. (D) Western blotting of *Bmal1* protein in the colons from WT and *Bmal1*<sup>-/-</sup> mice at ZT2. (E) Weight loss measurements of WT and *Bmal1*<sup>-/-</sup> mice treated with DSS. Data are mean ± SD (*n* = 8). \**p* < 0.05 versus WT at individual time points. (F) DAI scores of wild-type and *Bmal1*<sup>-/-</sup> mice treated with DSS. Data are mean ± SD (*n* = 8). (G) Colon length measurements of wild-type and *Bmal1*<sup>-/-</sup> mice treated with DSS. Colon length was assessed at the time of necropsy. Data are mean ± SD (*n* = 8). (H) Representative micrographs for H&E staining of the colon. Scale bar = 100 μm. (I) Histopathological scores of wild-type and *Bmal1*<sup>-/-</sup> mice treated with DSS. Data are mean ± SD (*n* = 8). (J). MPO activities of wild-type and *Bmal1*<sup>-/-</sup> mice treated with DSS. Data are mean ± SD (*n* = 8). For biochemical analyses, mice were sacrificed at ZT2 and the colons were collected. \**P* < 0.05 (t test or Mann–Whitney U test).

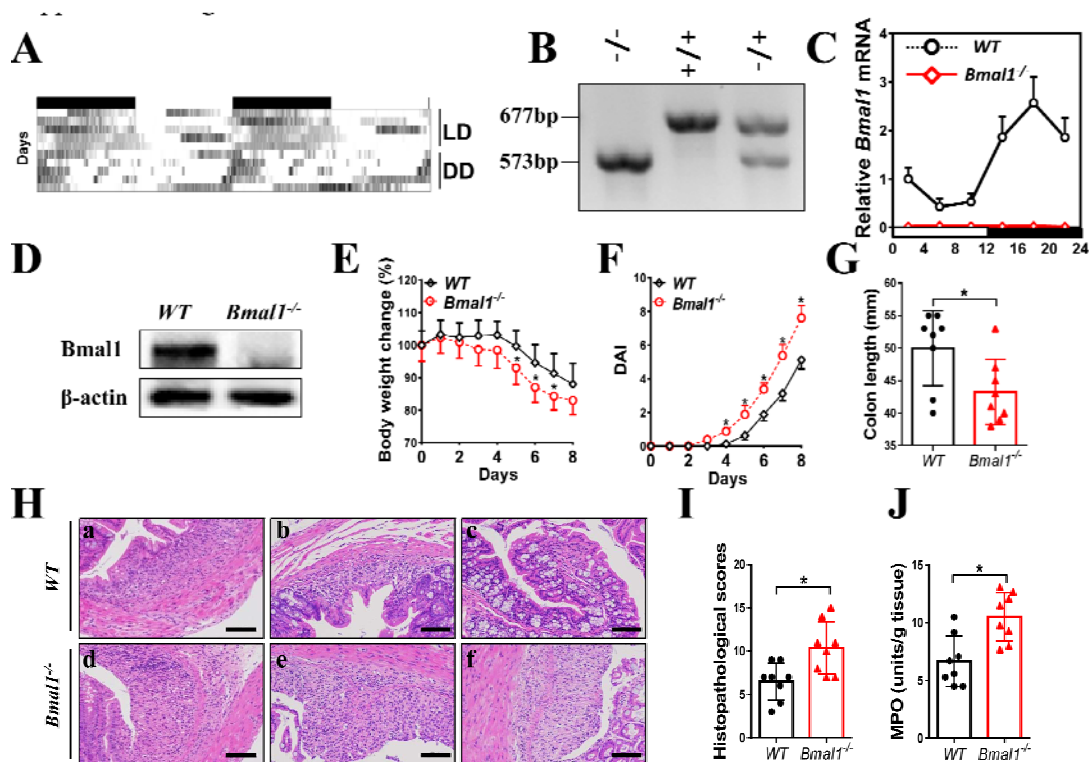

**Supplementary Figure 4. Establishment and validation of *Rev-erba* knockout mice using CRISPR/Cas9 technique.** (A) Schematic diagram of the gene sequence for *Rev-erba* showing the targeted region (between black arrows) for genetic deletion by the CRISPR/Cas9 technique. Green arrows indicate the positions of primers for PCR genotyping. (B) PCR genotyping of the tails from wild-type mice (WT, +/+), heterozygotes (+/-), and homozygotes (-/-). The bands of 516-bp and 920-bp indicate wild-type and mutant alleles respectively. (C) Western blotting of *Rev-erba* protein in colons from WT and *Rev-erba*<sup>-/-</sup> mice (ZT2).

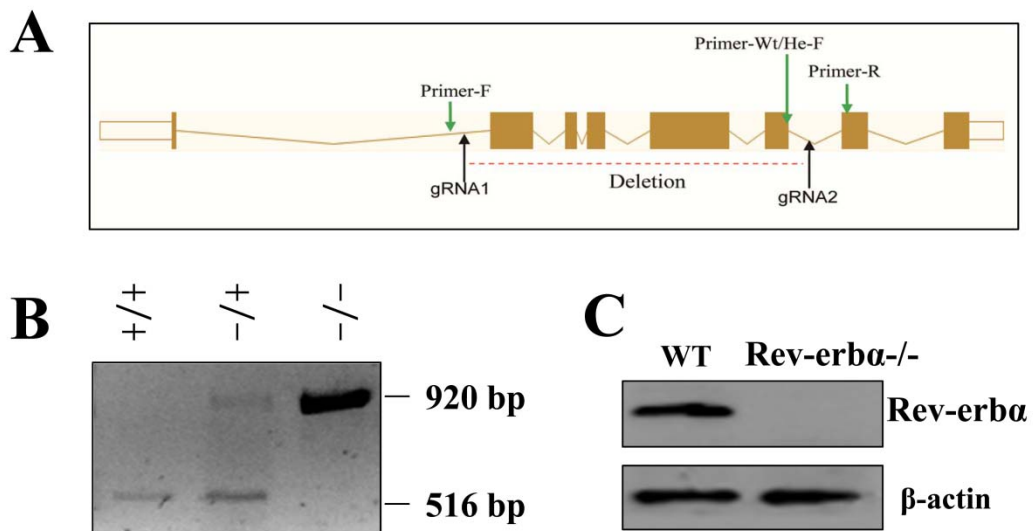

**Supplementary Figure 5.** qPCR assays on circadian and inflammatory-related genes in livers from WT mice. Data are mean  $\pm$  SD ( $n = 5$ ).

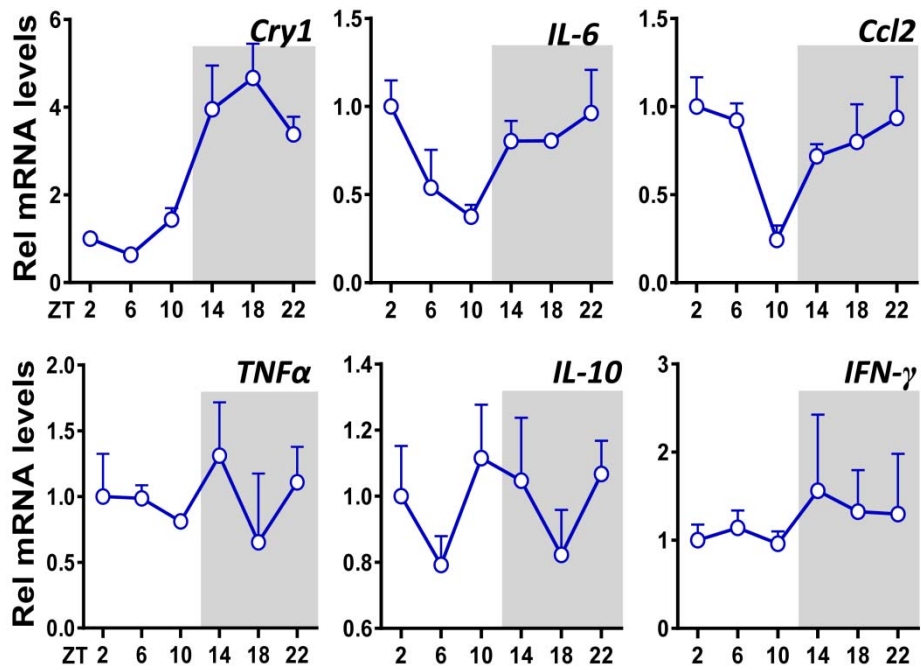

**Supplementary Figure 6.** (A) mRNA expressions of IL-18 in RAW264.7 cells treated with a Rev-erba agonist (SR9009 or GSK4112), Rev-erba siRNA or Rev-erba plasmid. (B) ELISA measurements of IL-18 in supernatant of PMs. PMs were pretreated with SR9009 or vehicle for 1-h and then stimulated with LPS for 12-h and ATP for 30-min (added last). (C) Western blotting of Nlrp3, IL-1 $\beta$  and  $\beta$ -actin in BMDMs. BMDMs were stimulated with LPS for 12-h and ATP for the last 0.5h. The blot shown is representative of three independent experiments. (D) mRNA expressions of TNF $\alpha$  in RAW264.7 cells treated with vehicle or SR9009. A concentration of 10  $\mu$ M was used for Rev-erba agonists. Data are mean  $\pm$  SD (n = 5). \*P < 0.05 (Mann–Whitney U test).

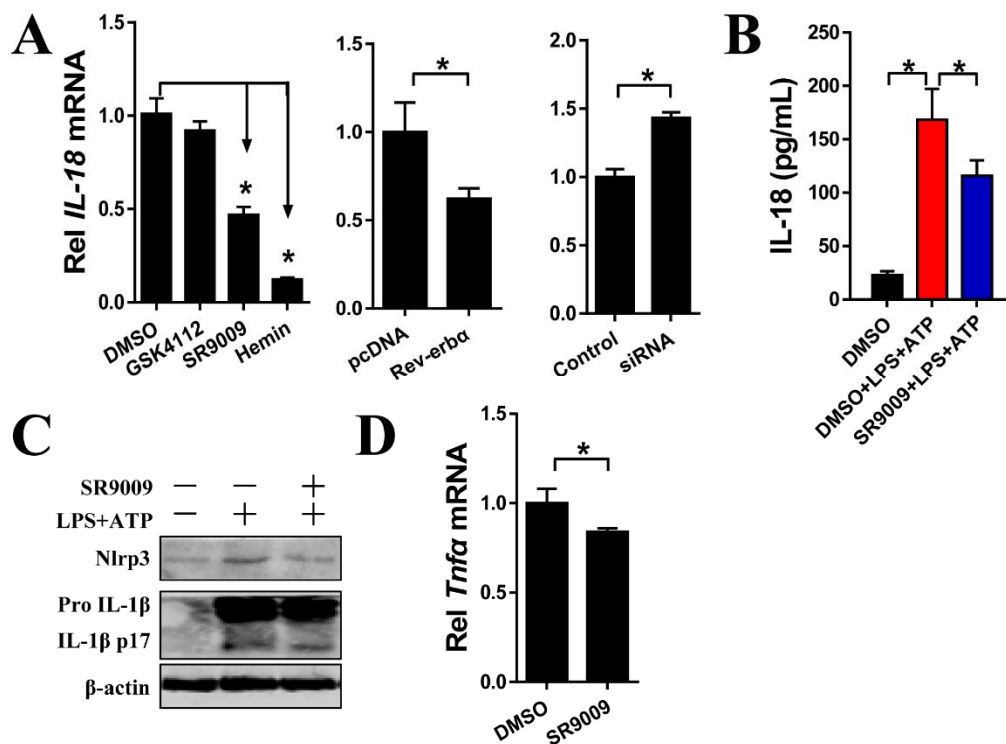

**Supplementary Figure 7.** (A) EMSA assay results, showing an interaction of Rev-erba with Nlrp3-RevRE. The assays were performed with labeled Nlrp3-RevRE probes or labeled Bmal1-RevRE probe as indicated in the presence of nuclear extracts or probe competitors. (B) EMSA assay results, showing an interaction of Rev-erba with p65-RevRE.

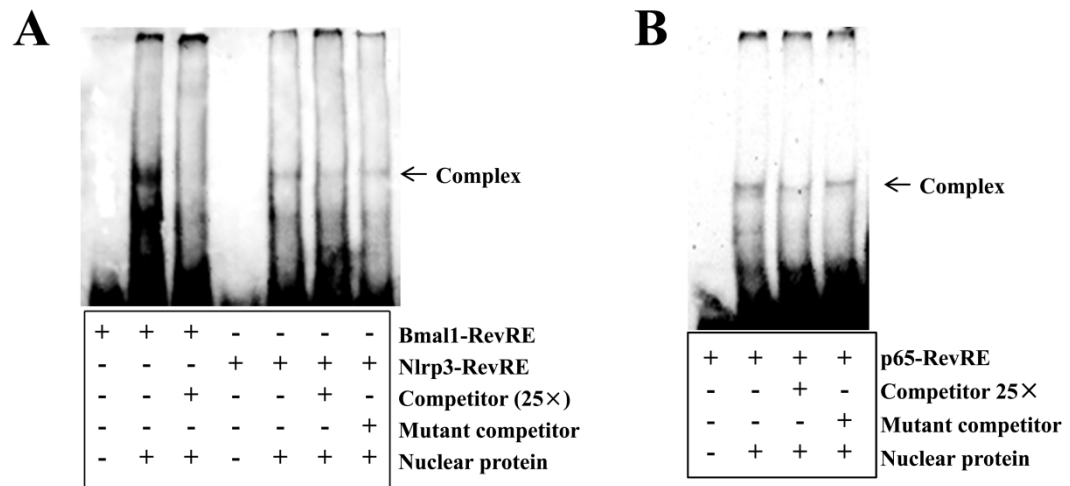

**Supplementary Figure 8.** (A) mRNA expressions of *p65* and *p50* in RAW264.7 cells measured by qPCR. The cells were treated with Rev-erb $\alpha$  siRNA (24-h) or Rev-erb $\alpha$  plasmid (24-h) or SR9009 (1-h), followed by stimulation with LPS (8-h). The concentrations of SR9009 and LPS for cell treatment were 10 $\mu$ M and 100 ng/ml, respectively. Data are mean  $\pm$  SD ( $n = 5$ ). \* $P < 0.05$  (Mann–Whitney U test). (B) Schematic diagram of p65 luciferase plasmids with normal or mutated p65 promoter.

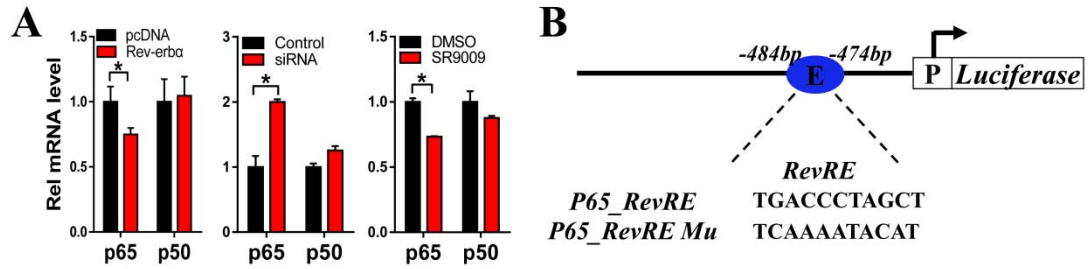

**Supplementary Figure 9. SR9009 fails to alleviate DSS-induced colitis in *Rev-erba*<sup>-/-</sup> mice.** (A) Weight loss measurements of SR9009- or vehicle-treated *Rev-erba*<sup>-/-</sup> mice with DSS feeding. Data are mean ± SD (*n* = 8). (B) DAI scores of SR9009- or vehicle-treated *Rev-erba*<sup>-/-</sup> mice with DSS feeding. Data are mean ± SD (*n* = 8). (C) Survival rates of SR9009- or vehicle-treated *Rev-erba*<sup>-/-</sup> mice with DSS feeding. (D) Colon lengths of SR9009- or vehicle-treated *Rev-erba*<sup>-/-</sup> mice with DSS feeding. Colon length was assessed at the time of necropsy. Data are mean ± SD (*n* = 6 for vehicle group, *n* = 5 for SR9009 group). (E) Representative micrographs for colon H&E staining. Scale bar = 100 μm. (F) Histopathological scores of SR9009- or vehicle-treated *Rev-erba*<sup>-/-</sup> mice with DSS feeding. Data are mean ± SD (*n* = 6 for vehicle group, *n*=5 for SR9009 group). (G) MPO activities of mouse colons on day 8. Data are mean ± SD (*n* = 6 for vehicle group, *n* =5 for SR9009 group). (H) qPCR analyses of *Nlrp3*, *IL-1β* and *IL-18* expressions in whole colon tissues of mice with colitis on day 8. Data are mean ± SD (*n* = 6 for vehicle group, *n*=5 for SR9009 group). (I) ELISA measurements of colonic IL-18 on day 8 after DSS feeding. Data are mean ± SD (*n* = 6 for vehicle group, *n*=5 for SR9009 group). (J) Western blotting of *Nlrp3*, *IL-1β* and β-actin in colons from mice with colitis on day 8. The blot shown is representative of three independent experiments. SR9009 (50 mg/kg) was administered to mice via intraperitoneal injection once daily at ZT8 for 7 days prior to DSS treatment, and SR9009 dosing was continued along with DSS treatment. \**P* < 0.05 (t test or Mann-Whitney U test). SR, SR9009.

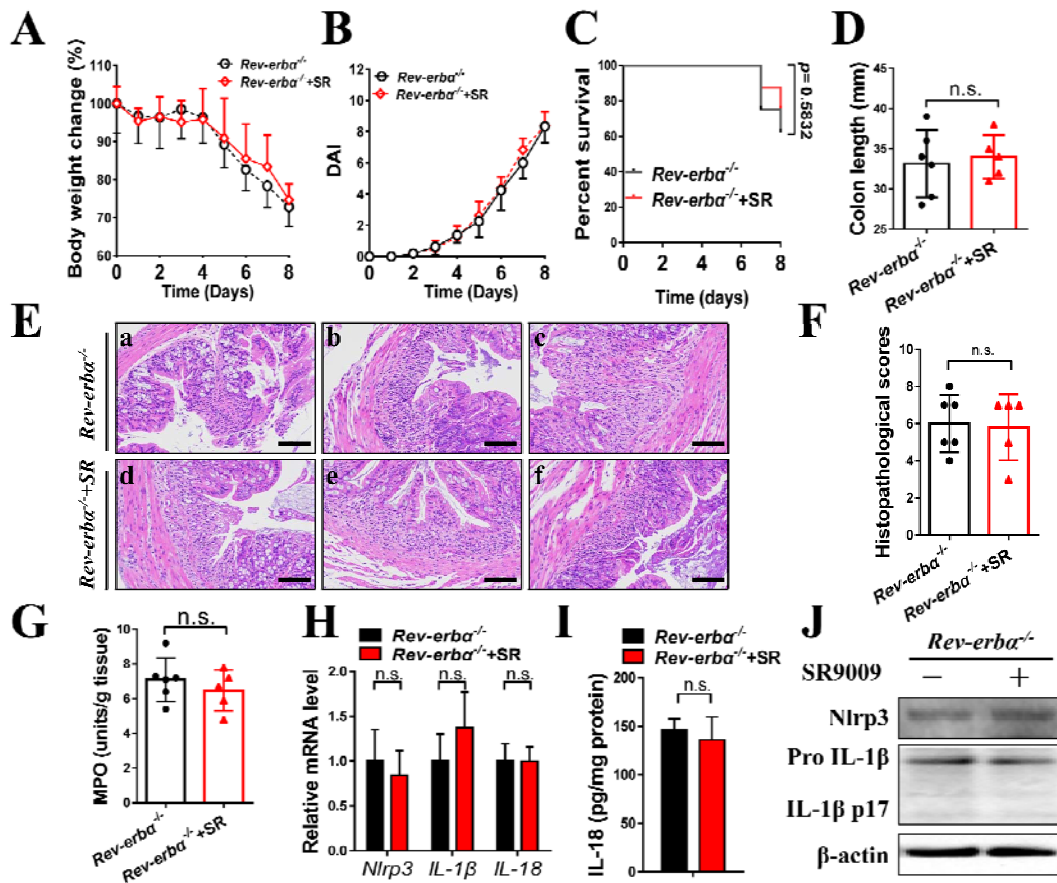



**Supplementary Figure 10.** (A) Circadian protein expression of Rev-erba in mouse (WT) livers. (B) Animal experimental protocol for SR9009 administration prior to colitis induction. (C) Animal experimental protocol for SR9009 administration after colitis induction (n=8). Weight loss measurements of WT and Rev-erba<sup>-/-</sup> mice treated with DSS. Data are mean ± SD (n = 8). \*p< 0.05 versus vehicle- treated mice at individual time points (Mann–Whitney U test). In all experiments, SR9009 (50 mg/kg) was administered to mice via intraperitoneal injection once daily at ZT8.

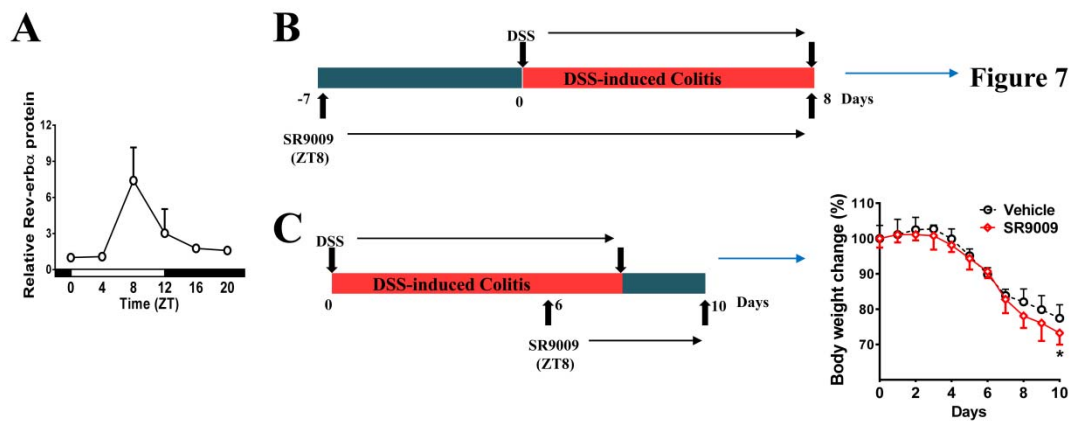

**Supplementary Figure 11.** qPCR measurements of *Nlrp3*, *IL-1 $\beta$* , *p65* and *Nr1d2* in Raw264.7 cells. The cells were transfected with Nr1d2 (Rev-erb $\beta$ ) plasmid 1 for 24-h and then stimulated with LPS for 8-h. Data are mean  $\pm$  SD ( $n = 3$ ).

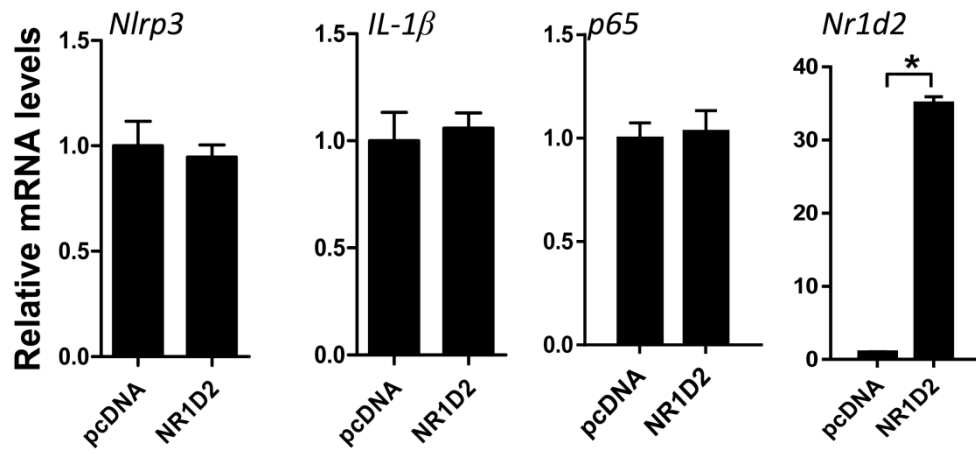

**Supplementary Figure 12.** Quantification data generated from Western blots in this study. Data are mean  $\pm$  SD. \* $p < 0.05$ . n.a., not applicable.

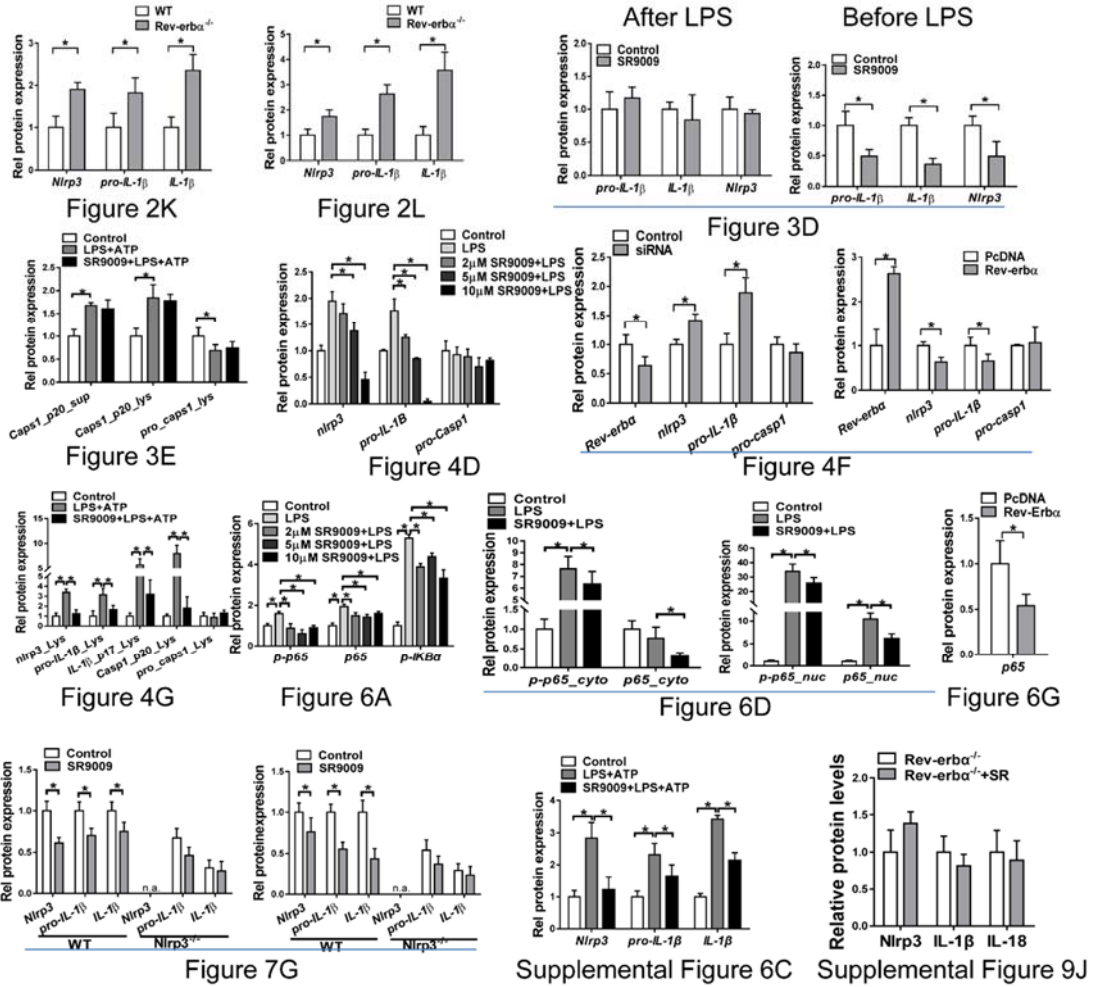

**Supplementary Figure 13.** Uncropped scans of representative Western blots.

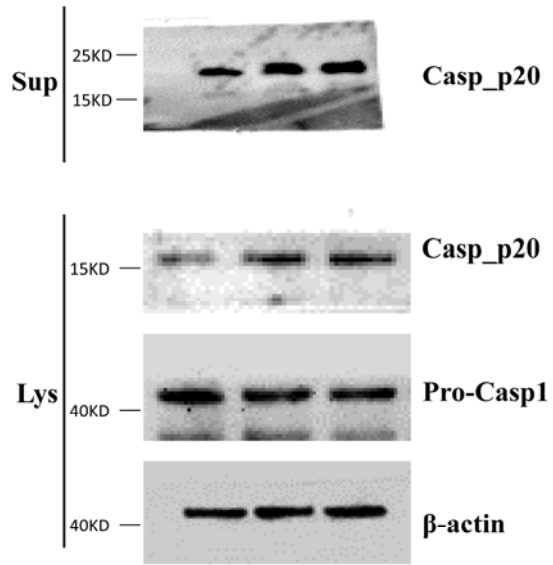

**Figure 3E**

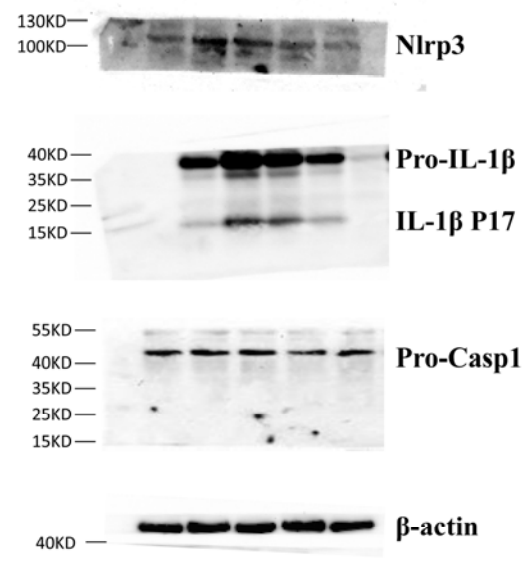

**Figure 4D**
